# Supplementary material for: Transcriptional Regulations on the Low-Temperature-Induced Floral Transition in anOrchidaceaeSpecies,Dendrobium nobile: An Expressed Sequence Tags Analysis
Source: Hindawi journal article supplement (doi:10.1155/2012/757801), 2012-01-01

Схема } aA^ FkS Scheme of library construction

| Library ID | Vernalization time (days) | Stage                         |
|------------|---------------------------|-------------------------------|
| 0d         | 0                         | Vegetative development        |
| (5+10)d    | 5, 10                     | Early stage of vernalization  |
| (20+30)d   | 20, 30                    | Middle stage of vernalization |
| 40d        | 40                        | Late stage of vernalization   |

## Additional file 2: Primers used in real-time qPCR

| Name     | Primer sequence (5'→3')      | Primer length | Amplicon length (bp) |
|----------|------------------------------|---------------|----------------------|
| AGL19    | CTCTGCTGTGCCTAAATGCT         | 20mer         | 114                  |
|          | AACTGTTGGTTCTTCCTCC          | 20mer         |                      |
| TSF      | TCAACTGTCAACGGGAGGC          | 19mer         | 101                  |
|          | GCTATAAGATTAGATAAACAAGGTGCTG | 28mer         |                      |
| FT       | CTCAGCAGTGGTGGAGCAGC         | 20mer         | 105                  |
|          | GGATCACTTGGACTTGGAGCAT       | 22mer         |                      |
| VRN1     | AAGCGGAAACAACAAAGACAG        | 21mer         | 144                  |
|          | CACCCGAGTAAGAGGAGGC          | 19mer         |                      |
| VEL1     | GCTGACAATGCCCTGAA            | 18mer         | 152                  |
|          | ACTGATTTTACCATTCTTCTGTGATAC  | 27mer         |                      |
| SVP      | GCCAGCTGAGAAATATGAGAGGAGATGA | 29mer         | 220                  |
|          | TTTCCATTTTTGACATTTCCACGAC    | 26mer         |                      |
| EMF2     | TGCACCCTAGTACATTGAAGTCT      | 23mer         | 198                  |
|          | TAATAATGTGGGGTAATGTTGATG     | 24mer         |                      |
| MSI1     | CTTCAGATATAGCAGATGGCAGAGA    | 23mer         | 118                  |
|          | GCACCATCAATTATCCCAAGAAG      | 23mer         |                      |
| MSI4/FVE | GCGGGGCATAGAGATAAAGTGGTTG    | 25mer         | 199                  |
|          | GCGCAGGTGAGGATATGGGACTT      | 23mer         |                      |
| 18s rRNA | GGTTCGCTGCTCGTGA CTCT        | 20mer         | 161                  |
|          | CAGGCACCGCTTATTTTTACA        | 21mer         |                      |

# Additional file 3:

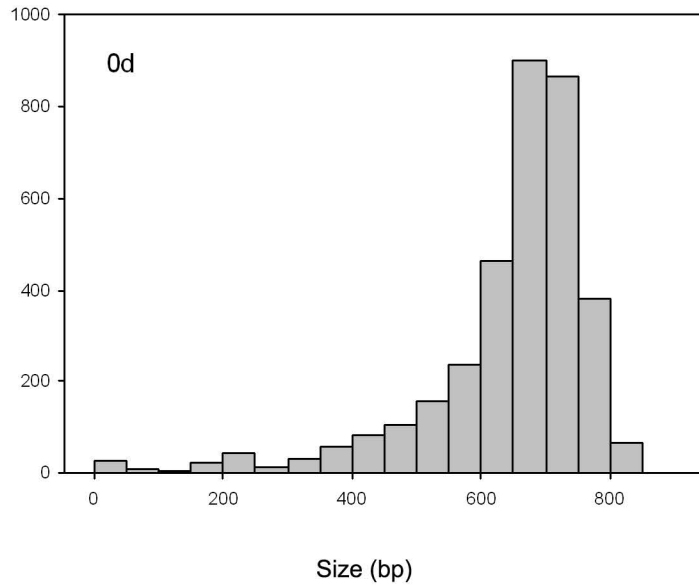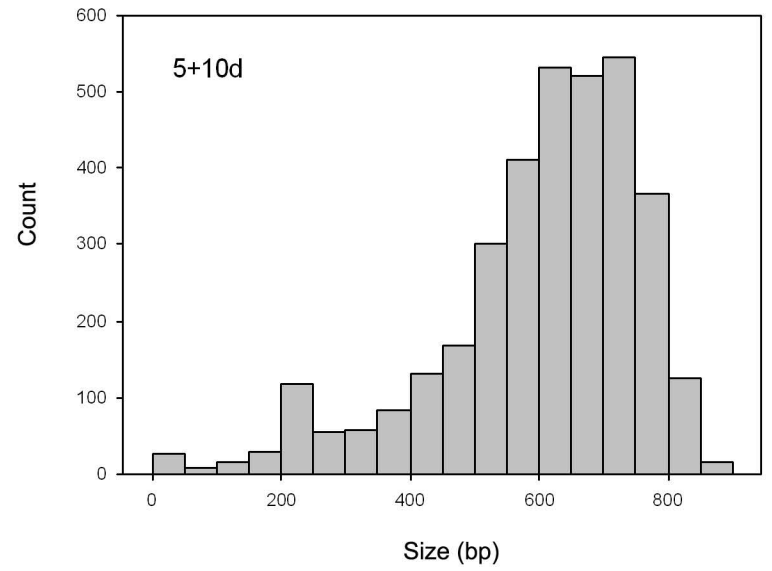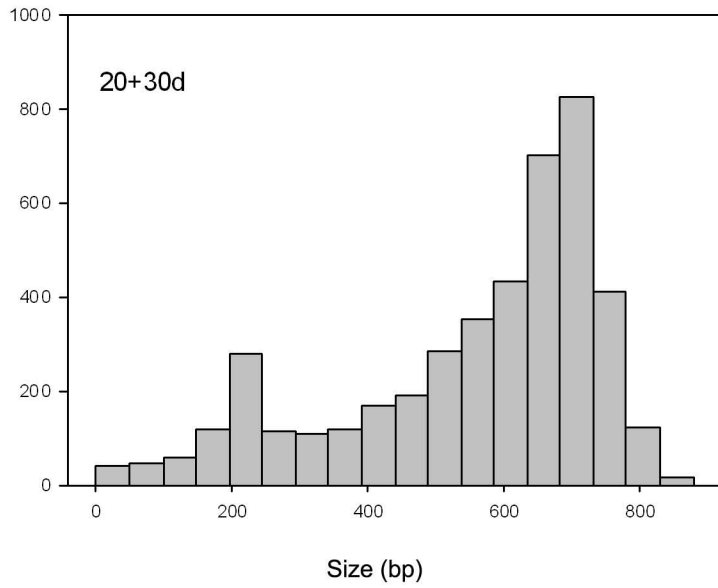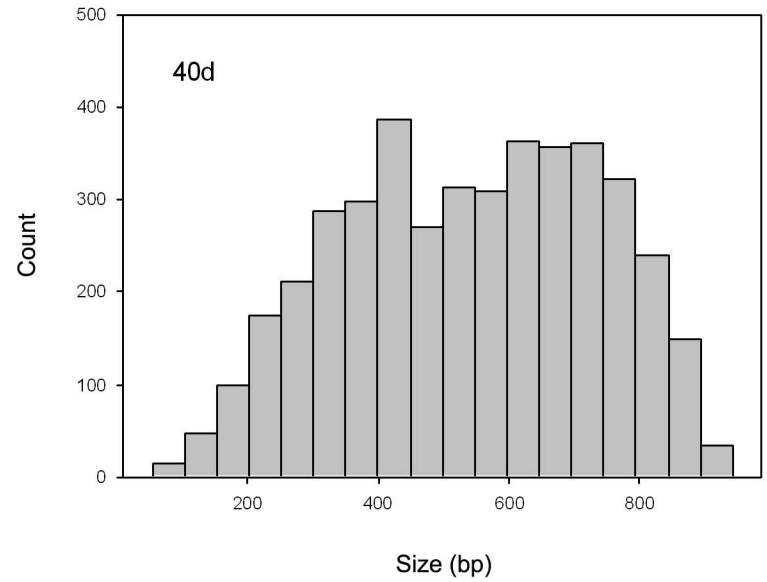

Distribution of EST size

**Additional file 4: Venn diagram and list of unigenes presenting in vernalized libraries (5+10d-, 20+30d- and 40d-library).**

A total of 4378 unigenes were absent in 0d-library and therefore were assigned as putative vernalization-related unigenes. Of these unigenes, 1561, 1796 and 1442 were from Library\_(5+10)d, Library\_(20+30)d and Library\_40d, respectively, while 28 were shared by three libraries.

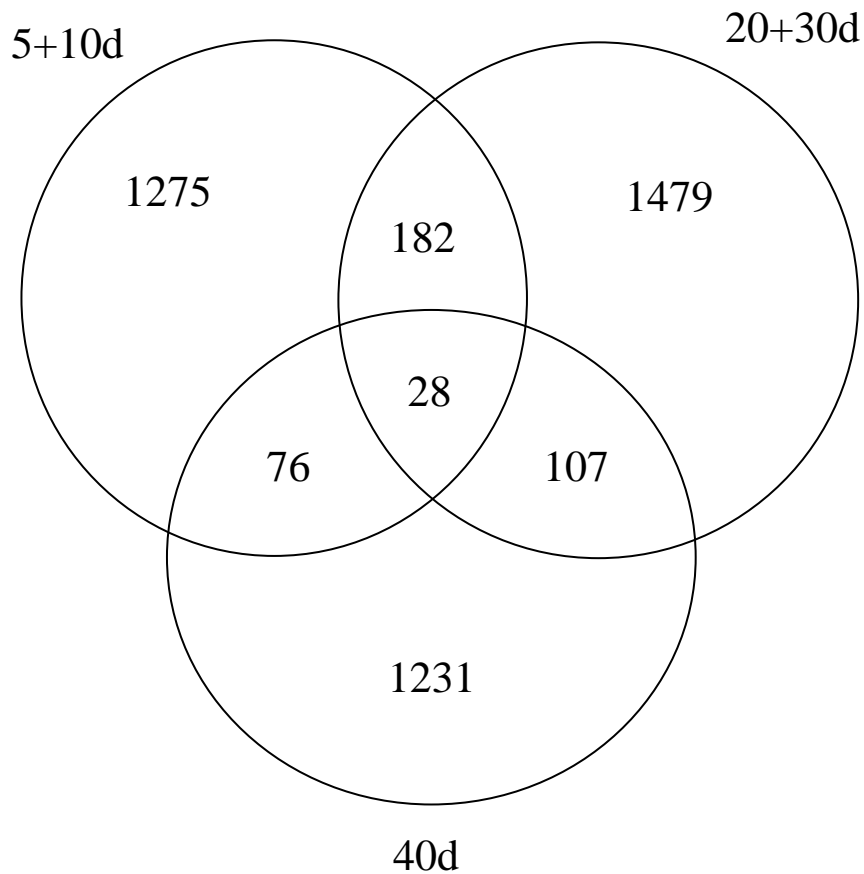

## Twenty-eight Unigene shared by the (5+10)d-, (20+30)d- and 40d-library

| Genbank Accession No. of homologous gene | E-value  | Description                                                                    | Frequency (%) |          |          |
|------------------------------------------|----------|--------------------------------------------------------------------------------|---------------|----------|----------|
|                                          |          |                                                                                | 5+10d         | 20+30d   | 40d      |
| gij115446513 ref NP_001047036.1          | 4.00E-52 | Os02g0534800 [Oryza sativa (japonica cultivar-group)]                          | 0.296824      | 0.243191 | 0.482509 |
| gij115456499 ref NP_001051850.1          | 5.00E-28 | Os03g0840900 [Oryza sativa (japonica cultivar-group)]                          | 0.593648      | 0.243191 | 0.241255 |
| gij116309951 emb CAH66982.1              | 6.00E-48 | H0714H04.9 [Oryza sativa (indica cultivar-group)]                              | 0.593648      | 0.243191 | 0.241255 |
| gij118482417 gb ABK93131.1               | 9.00E-28 | unknown [Populus trichocarpa]                                                  | 0.296824      | 0.243191 | 0.241255 |
| gij145408430 ref YP_001152053.1          | 2.00E-08 | ORF47a [Pinus koraiensis]                                                      | 0.296824      | 0.243191 | 0.482509 |
| gij147781237 emb CAN65143.1              | 3.00E-67 | hypothetical protein [Vitis vinifera]                                          | 0.296824      | 0.243191 | 0.723764 |
| gij147783026 emb CAN65596.1              | 6.00E-61 | hypothetical protein [Vitis vinifera]                                          | 0.296824      | 0.243191 | 0.241255 |
| gij149390985 gb ABR25510.1               | 2.00E-49 | tubulin alpha-1 chain [Oryza sativa (indica cultivar-group)]                   | 0.296824      | 0.243191 | 0.241255 |
| gij15224284 ref NP_181874.1              | 1.00E-29 | 60S ribosomal protein L38 (RPL38A) [Arabidopsis thaliana]                      | 0.296824      | 0.729572 | 0.723764 |
| gij15234793 ref NP_194222.1              | 4.00E-21 | protein transport protein SEC61 gamma subunit, putative [Arabidopsis thaliana] | 0.296824      | 0.243191 | 0.482509 |
| gij157336898 emb CAO71583.1              | 1.00E-41 | unnamed protein product [Vitis vinifera]                                       | 0.296824      | 0.243191 | 0.241255 |
| gij157338896 emb CAO42247.1              | 1.00E-26 | unnamed protein product [Vitis vinifera]                                       | 0.296824      | 0.486381 | 0.241255 |
| gij157342327 emb CAO64440.1              | 6.00E-36 | unnamed protein product [Vitis vinifera]                                       | 0.296824      | 0.243191 | 0.965018 |
| gij157342485 emb CAO65197.1              | 4.00E-16 | unnamed protein product [Vitis vinifera]                                       | 0.296824      | 0.243191 | 0.241255 |
| gij157345765 emb CAO15063.1              | 7.00E-90 | unnamed protein product [Vitis vinifera]                                       | 0.296824      | 0.243191 | 0.241255 |
| gij157354559 emb CAO47185.1              | 6.00E-14 | unnamed protein product [Vitis vinifera]                                       | 0.296824      | 0.243191 | 0.723764 |
| gij157358359 emb CAO66019.1              | 9.00E-33 | unnamed protein product [Vitis vinifera]                                       | 1.48412       | 0.486381 | 0.482509 |
| gij166245064 dbj BAG06616.1              | 5.00E-44 | ribosomal protein S19 [Dendrobium sp. JLB71]                                   | 0.296824      | 0.243191 | 0.241255 |
| gij16930757 gb AAL32038.1 AF439279_1     | 2.00E-31 | early light-induced protein-like protein [Retama raetam]                       | 0.890472      | 0.243191 | 0.241255 |
| gij21593543 gb AAM65510.1                | 9.00E-98 | 60S ribosomal protein L4-B (L1) [Arabidopsis thaliana]                         | 0.593648      | 0.243191 | 0.241255 |
| gij29565662 ref NP_817244.1              | 4.00E-09 | ORF45d [Pinus koraiensis]                                                      | 0.296824      | 0.486381 | 0.482509 |
| gij3122800 sp O22647 RS16_FRIAG          | 2.00E-65 | 40S ribosomal protein S16 ribosomal protein S16 [Fritillaria agrestis]         | 0.593648      | 0.729572 | 0.482509 |
| gij556367 gb AAA50310.1                  | 7.00E-66 | light-harvesting chlorophyll a/b-binding protein                               | 0.296824      | 0.243191 | 0.482509 |
| gij55775689 gb AAV65112.1                | 2.00E-66 | histone 3 [Camellia sinensis]                                                  | 0.593648      | 0.243191 | 0.241255 |
| gij64213910 gb AAY41234.1                | 2.00E-55 | putative peptidyl-prolyl cis-trans isomerase [Gossypium hirsutum]              | 0.296824      | 0.243191 | 0.482509 |
| gij71040673 gb AAZ20285.1                | 1.00E-67 | ubiquitin fusion protein [Arachis hypogaea]                                    | 0.296824      | 0.972763 | 0.482509 |
| gij84620804 gb ABC59516.1                | 2.00E-57 | chloroplast photosystem II 22 kDa component [Nicotiana benthamiana]            | 0.296824      | 0.729572 | 0.241255 |
| gij94502636 ref YP_588293.1              | 4.00E-41 | chloroplast hypothetical protein [Zea mays subsp. mays]                        | 5.342832      | 16.53696 | 0.482509 |

Frequency of a unigene = (Number of EST for a given unigene/the total number of EST of the library) × 1000.

**Additional file 5: Expression of some selected genes in axillary buds of *D.***

***nobile*.**

Semi-quantization RT-PCR was used to monitor the changes of expression before and during the vernalization. Tubulin served as endogenous control to normalize the inputs of RNA templates. These results are in consistence with those from real-time qPCR to a large extent (Figure 4).

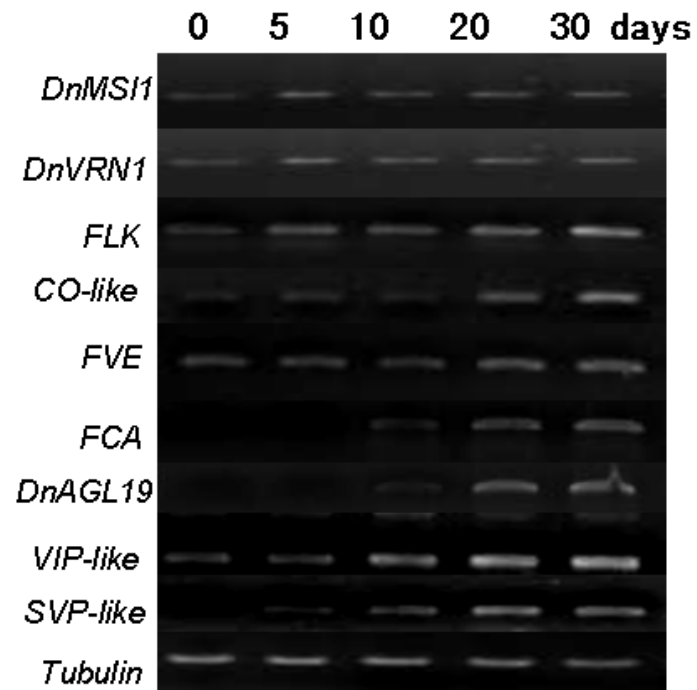

### Primer pairs used in RT-PCR assay

| Gene            | Primer 1 (5'→3')      | Primer 2 (5'→3')      |
|-----------------|-----------------------|-----------------------|
| <i>MSI1</i>     | AACACGCCGTTTCCTTTACG  | GCCCTTCAATCTCAAATCAGG |
| <i>VRN1</i>     | CGCTTATCATCTTCTCCACG  | TGTTTCCGCTTTGTATCCTG  |
| <i>FLK</i>      | CATCCAGGAGTTTATTGCCG  | GTAATCAGGTAGCCATCCGT  |
| <i>CO-LIKE</i>  | CGACATCCACTCCGCAAAT   | GCCTGTTCTTCCTCTTCTCC  |
| <i>FVE</i>      | GGGCATAGAGATAAAGTGTTG | ATTCGGGTTGCTGTGGAT    |
| <i>FCA</i>      | ACTCCACCGAATCAGCACCA  | ACCAGTTCGCCAGTCCTTGA  |
| <i>AGL19</i>    | ACGGAGATGAGGCGGATAGA  | GGCAGAGCAGGATTCAAGGT  |
| <i>VIP-LIKE</i> | TGTTAGGGAGAGTGTAGGCA  | ATTGGTGCGGAGAGAAGAC   |
| <i>SVP-LIKE</i> | CCTATCCAAACAAGACCAACC | ATTTCCACGACCTGCTGTC   |

# Additional file 6:

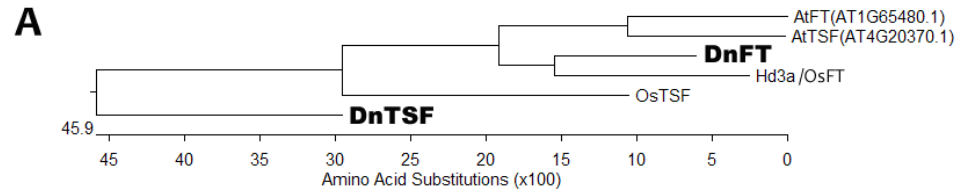

|            |   | Percent Identity |      |      |      |      |      |   |                    |
|------------|---|------------------|------|------|------|------|------|---|--------------------|
|            |   | 1                | 2    | 3    | 4    | 5    | 6    |   |                    |
| Divergence | 1 | █                | 60.1 | 59.2 | 62.4 | 57.3 | 56.7 | 1 | <b>DnTSF</b>       |
|            | 2 | 56.3             | █    | 80.7 | 67.2 | 74.1 | 74.1 | 2 | <b>DnFT</b>        |
|            | 3 | 58.2             | 22.4 | █    | 64.9 | 71.4 | 71.4 | 3 | Hd3a / <b>OsFT</b> |
|            | 4 | 51.7             | 42.9 | 47.0 | █    | 64.0 | 65.1 | 4 | OsTSF              |
|            | 5 | 62.2             | 31.7 | 36.0 | 48.8 | █    | 81.7 | 5 | AtFT(AT1G65480.1)  |
|            | 6 | 63.5             | 31.7 | 36.0 | 46.7 | 21.0 | █    | 6 | AtTSF(AT4G20370.1) |
|            |   | 1                | 2    | 3    | 4    | 5    | 6    |   |                    |

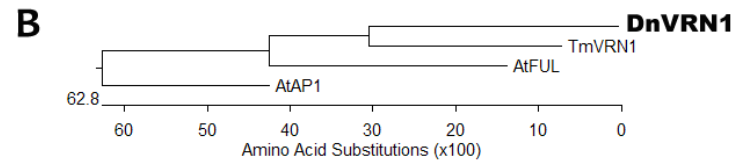

|            |   | Percent Identity |      |      |      |   |               |
|------------|---|------------------|------|------|------|---|---------------|
|            |   | 1                | 2    | 3    | 4    |   |               |
| Divergence | 1 | █                | 48.5 | 53.8 | 61.5 | 1 | <b>DnVRN1</b> |
|            | 2 | 84.0             | █    | 54.2 | 51.9 | 2 | AtAP1         |
|            | 3 | 70.2             | 69.3 | █    | 56.1 | 3 | AtFUL         |
|            | 4 | 53.7             | 74.9 | 64.9 | █    | 4 | TmVRN1        |
|            |   | 1                | 2    | 3    | 4    |   |               |

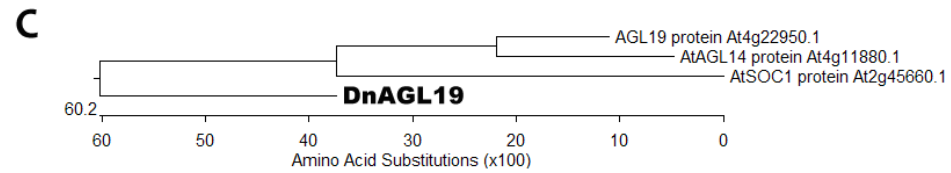

|            |   | Percent Identity |      |      |      |   |                             |
|------------|---|------------------|------|------|------|---|-----------------------------|
|            |   | 1                | 2    | 3    | 4    |   |                             |
| Divergence | 1 | █                | 48.8 | 52.7 | 51.0 | 1 | <b>DnAGL19</b>              |
|            | 2 | 83.1             | █    | 57.1 | 53.5 | 2 | AtSOC1 protein At2g45660.1  |
|            | 3 | 73.0             | 62.8 | █    | 76.7 | 3 | AGL19 protein At4g22950.1   |
|            | 4 | 77.3             | 70.9 | 27.9 | █    | 4 | AtAGL14 protein At4g11880.1 |
|            |   | 1                | 2    | 3    | 4    |   |                             |



## Additional file 7

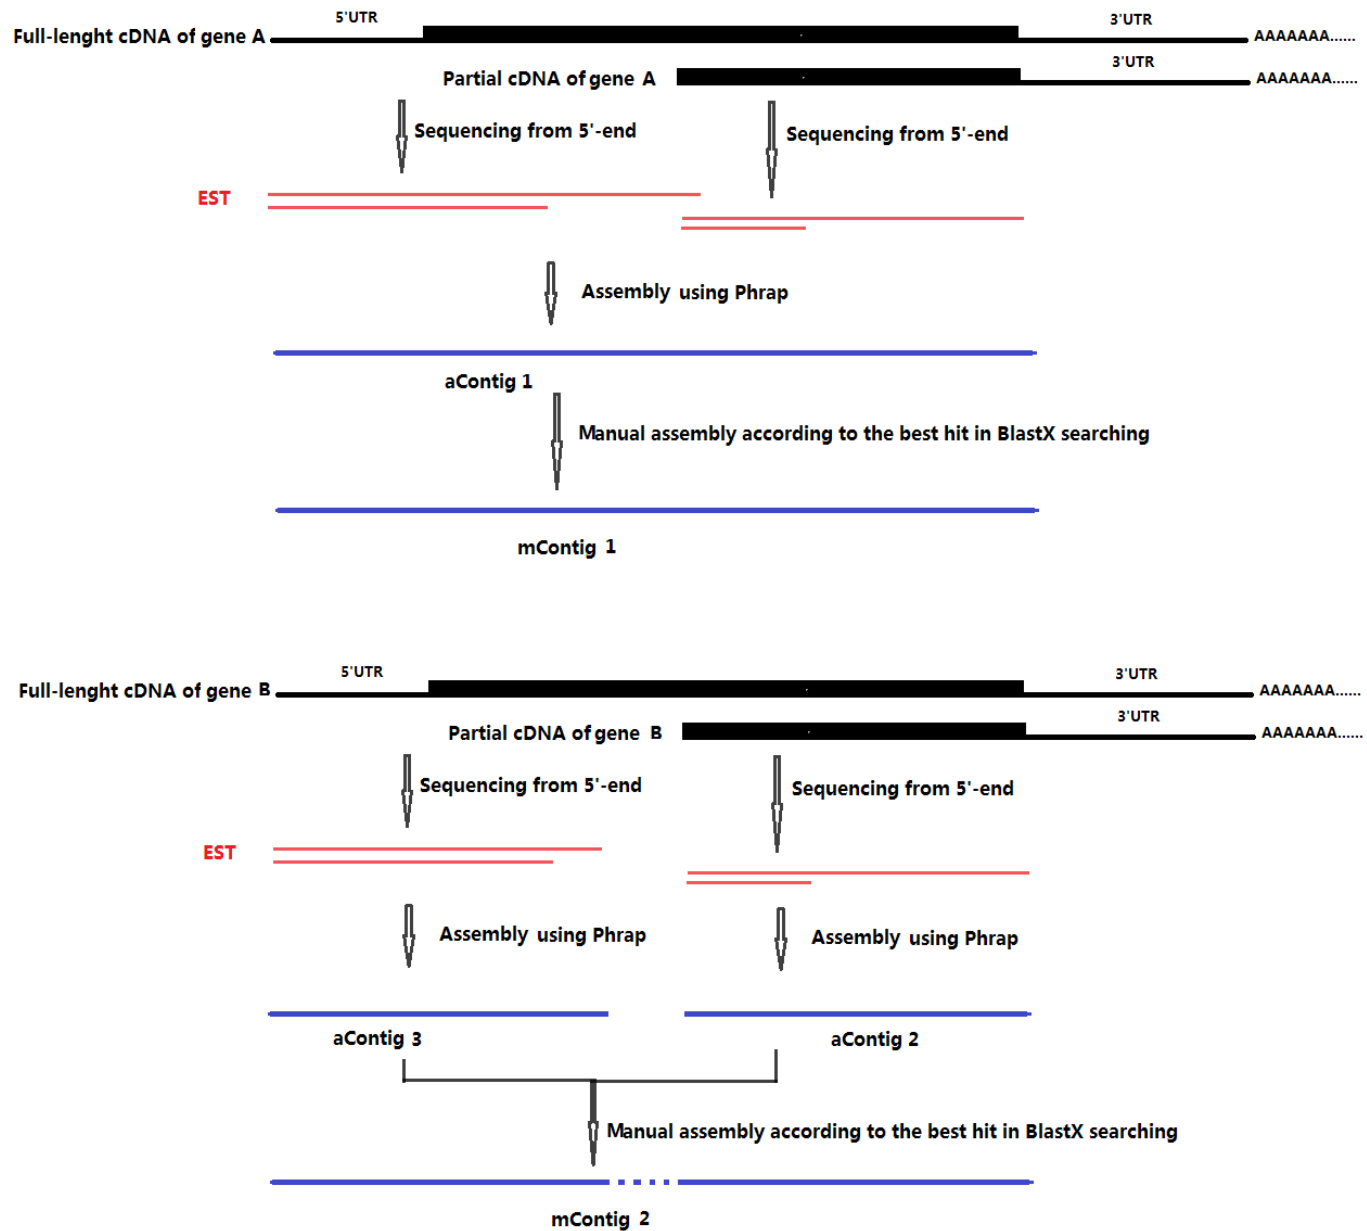

Supplement: f1 [file 757801.f1.pdf]
